# Supplementary material
Source: MDPI journal article supplement (https://www.mdpi.com/2221-3759/8/4/34)
Supplement: s1 [file s1]

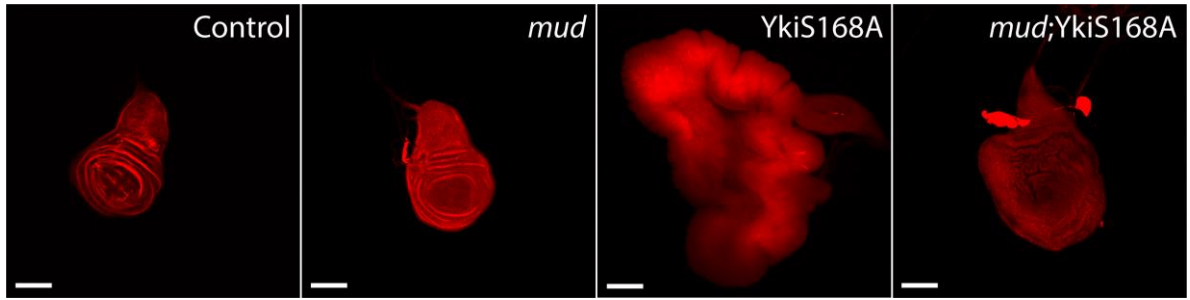

**Figure S1.** Equally scaled images of third instar imaginal wing discs illustrate effects of Yki<sup>S168A</sup> and *mud*<sup>RNAi</sup> expression on disc size
